# Supplementary material for: Precise determination of major and trace elements in micrometer-scale ilmenite lamellae in titanomagnetite using LA-ICP-MS technique: application of regression analysis to time-resolved signals
Source: Royal Society of Chemistry journal article supplement (doi:10.1039/d3ra02472e), 2023-01-01
Supplement: d3ra02472e1.pdf [file d3ra02472e1.pdf]

## 1 **Appendix ESI Tables**

### 2 **ESI Table 1**

3 Analytical results and applied conditions for magnetite and ilmenite using EPMA.

### 4 **ESI Table 2**

5 Analytical results for direct analyses on magnetite, coarse granular ilmenite and  
6 reference materials (as unknown) using LA-ICP-MS

### 7 **ESI Table 3**

8 An example of data reduction applied segmented signals and regression analysis.

### 9 **ESI Table 4**

10 Results of regression analysis on coarse granular ilmenite exsolutions (n=8).

### 11 **ESI Table 5**

12 Results of regression analysis on fine ilmenite exsolutions (n=12).

13
