# Supplementary material for: Precise determination of major and trace elements in micrometer-scale ilmenite lamellae in titanomagnetite using LA-ICP-MS technique: application of regression analysis to time-resolved signals
Source: Royal Society of Chemistry journal article supplement (doi:10.1039/d3ra02472e), 2023-01-01
Supplement: d3ra02472e2.xlsx [file d3ra02472e2.xlsx]

## Sheet: S1-EPMA
RSC Advances:
Liu et al: Precise determination of major and trace elements in micrometer-scale ilmenite lamellae in titanomagnetite using LA-ICP-MS technique: Application of regression analysis to time-resolved signals
ESI Table 1: Analytical results (in ppm) and applied conditions for magnetite and ilmenite using EPMA													Analytical conditions of EPMA analyses for Fe-Ti oxides
													Element (X-ray line)	Standard	Analysing Crystal	Detection limit (ppm,1sigma)
ilmenite (n=6)													Ti (Kα)	Rutile	PETJ	80
note	Ti	Ca	Nb	Al	Mg	Si	Fe	Mn	Cr	V			Ca (Kα)	Diopside	PETJ	760
Ilm-f-1	356475	28.5878	307.529	5.292	100205	n.a.	163577	23675.3	6.84208	312.691			Nb(Lα)	Niobium	PETH	170
Ilm-f-2	355894	n.a.	146.775	10.584	101538	32.7199	163523	23566.9	13.6842	346.68			Al(Kα)	Corundum	TAP	70
Ilm-f-3	355648	7.14696	230.647	37.044	100482	32.7199	163802	24171	n.a.	455.442			Mg(Kα)	Diopside	TAP	60
Ilm-f-4	352741	14.2939	419.358	15.876	95555.2	46.7428	175330	23721.8	n.a.	462.239			Si(Kα)	Olivine	TAP	80
Ilm-c-1	355198	n.a.	286.561	n.a.	99704.5	60.7656	164688	24147.7	n.a.	421.454			Fe(Kα)	Hematite	LIF	180
Ilm-c-2	356253	7.14696	125.807	58.2177	102292	70.1142	162489	24449.8	n.a.	319.489			Mn(Kα)	Manganese	LIFH	90
MAX	356475	28.5878	419.358	58.2177	102292	70.1142	175330	24449.8	13.6842	462.239	= MAX(i content)		Cr(Kα)	Chromium	LIFH	80
MIN	352741	n.a.	125.807	n.a.	95555.2	n.a.	162489	23566.9	n.a.	312.691	= MIN(i content)		V(Kα)	Vanadium	PETJ	80
AVG	355368	14.2939	252.78	25.4027	99962.8	48.6125	165568	23955.4	10.2631	386.332	= AVERAGE(i content)
DEV	1244.65	8.7532	99.7796	19.6323	2149.73	14.9577	4412.39	319.332	3.42104	62.2292	= STDEV.P(i content)
magnetite (n=6)
note	Ti	Ca	Nb	Al	Mg	Si	Fe	Mn	Cr	V
Mag-1	1070	30	n.a.	110	6390	100	708180	540	n.a.	3280
Mag-2	1120	n.a.	n.a.	120	6760	n.a.	706040	590	90	3440
Mag-3	1690	n.a.	n.a.	130	6380	n.a.	704530	620	50	3490
Mag-4	1540	n.a.	n.a.	100	6460	110	705150	560	140	3550
Mag-5	2130	n.a.	60	110	6460	40	707530	620	70	3540
Mag-6	1690	n.a.	n.a.	200	6360	n.a.	706750	760	40	3570
MAX	2130	30	60	200	6760	110	708180	760	140	3570
MIN	1070	n.a.	n.a.	100	6360	n.a.	704530	540	n.a.	3280	= MAX(i content)
AVG	1540	30	60	128.333	6468.33	83.3333	706363	615	78	3478.33	= MIN(i content)
DEV	362.951	0	0	33.375	135.943	30.9121	1274.67	71.122	35.4401	98.5591	= AVERAGE(i content)
											= STDEV.P(i content)
Note: n.a. represents not applicable.

## Sheet: S2-LA
RSC Advances:
Liu et al: Precise determination of major and trace elements in micrometer-scale ilmenite lamellae in titanomagnetite using LA-ICP-MS technique: Application of regression analysis to time-resolved signals
ESI Table 2: Analytical results for magnetite, ilmenite and reference materials using LA-ICP-MS
Note: n.a. represents not applicable.
	Element	Li	Be	B	Na	Mg	Al	Si	P	K	Ca	Sc	Ti	V	Cr	Mn	Fe	Co	Ni	Cu	Zn	Ga	Ge	As	Rb	Sr	Y	Zr	Nb	Mo	Ag	Cd	In	Sn	Sb	Cs	Ba	La	Ce	Pr	Nd	Sm	Eu	Gd	Tb	Dy	Ho	Er	Tm
	mass	7	9	11	23	25	27	29	31	39	42	45	47	51	53	55	57	59	60	63	66	71	73	75	85	88	89	90	93	95	107	111	115	118	121	133	137	139	140	141	146	147	153	157	159	163	165	166	169
	unit	ppm	ppm	ppm	ppm	ppm	ppm	ppm	ppm	ppm	ppm	ppm	ppm	ppm	ppm	ppm	ppm	ppm	ppm	ppm	ppm	ppm	ppm	ppm	ppm	ppm	ppm	ppm	ppm	ppm	ppm	ppm	ppm	ppm	ppm	ppm	ppm	ppm	ppm	ppm	ppm	ppm	ppm	ppm	ppm	ppm	ppm	ppm	ppm
	D.L.	6.59423	0.402454	5.8101	22.7348	2.15429	1.73263	545.838	79.2718	13.7202	475.488	0.274279	1.19508	0.0959389	1.93856	0.781899	23.4912	0.0901206	0.793208	0.449901	1.23787	0.20796	0.709817	1.10193	0.503212	0.037506	0.0047746	0.0141908	0.00408731	0.0867224	0.0188617	0.226786	0.0286333	0.42956	0.124935	0.161247	0.060947	0.00541695	0.0118599	0.00164228	0.014986	0.00523882	0.00745548	0.0523933	0.00681089	0.0127041	0.00316746	0.00639501	0.0016644
ilmenite	CT-135-ILM-1	9.93435	0.0140346	0.819286	41.4145	92663.2	9.02259	432.627	80.8335	3.02444	n.a.	344.322	351543	838.026	n.a.	22470.5	175772	72.4973	30.0924	0.491988	537.463	0.165064	0.0236994	0.314896	0.157719	0.114343	0.0234604	38.715	381.087	0.21827	0.000458005	0.0884737	0.183092	24.5812	n.a.	n.a.	0.279535	0.0612661	0.0732984	0.00913207	0.0132129	n.a.	n.a.	0.000667386	0.0020549	n.a.	n.a.	n.a.	n.a.
	CT-135-ILM-2	16.4988	n.a.	n.a.	67.1081	93180.2	14.5753	1088.91	n.a.	9.02424	682.001	328.156	350692	757.962	1.5889	22775.7	174179	72.2709	29.7051	0.583081	530.781	0.294914	n.a.	0.921176	n.a.	4.71556	0.0232786	39.6703	375.071	0.416368	0.036994	0.0914866	0.257914	23.6493	0.0441144	0.0274249	0.269235	0.0668644	0.0621393	0.0807337	0.18652	0.046621	n.a.	n.a.	0.00207351	0.000873639	n.a.	0.0238871	0.00205149
	CT-135-ILM-3	12.3218	0.274658	2.43501	53.5138	94304.1	10.3164	985.826	11.0004	27.7178	226.191	322.884	356120	725.653	0.289851	22378.2	166900	73.1457	31.4878	1.81516	549.488	0.301006	0.0622298	0.640647	n.a.	0.181926	0.0192126	40.5809	345.228	0.345283	0.0178207	0.133179	0.226434	26.3601	0.0628854	n.a.	0.746781	0.0652059	0.24289	0.015523	0.0384565	0.029897	n.a.	n.a.	0.0121793	0.02522	0.00208363	0.0231623	0.00197461
magnetite	CT-135-MAG-1	3.32032	0.231105	n.a.	0.522826	8590.41	144.954	877.017	n.a.	22.674	32.8248	6.93621	263.253	3397.15	n.a.	819.477	705557	89.6388	225.821	0.105735	119.334	9.31986	1.6975	0.719853	0.277579	0.0303201	n.a.	0.0834171	0.0171925	0.0175812	n.a.	0.144055	0.000616615	1.35246	0.0175587	n.a.	0.475276	0.00430826	0.00454013	0.00371825	0.0107404	n.a.	n.a.	n.a.	0.00167402	0.00704429	0.00174601	0.0130378	0.00993045
	CT-135-MAG-3	1.84822	n.a.	2.35041	18.8084	8456.09	141.607	760.229	74.035	90.3282	339.439	6.64523	269.682	3382.49	0.512292	815.012	705361	90.3976	232.343	1.3186	140.748	9.63521	1.70217	0.433169	0.248352	1.57555	n.a.	0.0871391	0.056261	0.127251	0.00773591	0.00354368	0.00868691	1.24086	0.000841519	n.a.	0.344448	0.057058	0.13323	1.42613	0.0950181	n.a.	0.00333111	n.a.	8.23965e-05	0.0138514	0.00686691	0.0195189	n.a.
	CT-135-MAG-5	2.28266	0.0120211	n.a.	24.3551	8229.27	127.336	823.977	n.a.	28.824	152.665	6.78034	256.294	3425.62	n.a.	799.479	705947	89.1601	225.765	0.420695	123.55	9.90495	1.69431	0.814369	0.161525	0.123137	n.a.	0.0422106	0.141795	0.147153	0.0229701	0.143728	0.0146261	0.613939	0.0266908	n.a.	0.757577	0.00215814	0.000111674	n.a.	0.0108288	n.a.	n.a.	0.0110318	0.175748	0.00707472	8.87422e-05	0.00755186	n.a.
BCR-2G	RMA-1	4.87604	3.39099	10.3365	23937.3	21327.4	71359.4	255578	909.174	14745.6	51577.3	35.4094	13618.3	431.694	17.0252	1565.46	98814.7	37.7496	11.9667	18.3019	145.223	21.7879	2.63116	0.7316	45.7624	350.112	34.3667	189.081	11.8618	270.603	0.532528	0.334723	0.114644	1.77688	0.126662	1.21626	685.005	25.5226	53.4325	6.70367	29.1613	6.49231	2.0433	6.83731	1.00191	6.62901	1.3922	4.53804	0.495339
	RMA-2	8.01093	3.03579	7.15872	24159.4	20810.5	71021.5	256308	2254.37	14888	51188.2	34.6285	13841.8	427.693	16.6257	1552.3	96244.9	37.2141	12.1567	17.7285	142.242	20.4232	1.68791	0.603404	46.8666	342.189	34.2365	184.827	11.8982	271.302	0.674338	0.171464	0.0719557	2.20555	0.0763269	1.27178	688.731	25.4252	53.6724	6.64347	28.9084	7.6535	1.83546	6.15586	0.915407	5.91541	1.2775	4.67657	0.540541
	RMA-3	13.3004	3.13146	5.02842	24028.3	20755.3	71674.3	255513	2373.36	14781.3	52175.4	35.2918	13587.9	428.285	15.2799	1538.47	95976.7	37.5833	12.0668	16.6999	150.486	19.9772	1.75716	0.684478	44.8102	339.252	34.9913	187.492	11.4713	271.441	0.60806	0.333969	0.055142	2.14551	0.348917	1.28924	682.962	25.3745	53.181	6.79077	28.5336	6.9462	2.10642	6.34166	0.967129	6.64177	1.29226	5.09055	0.475875
	average	8.72914	3.18608	7.50788	24041.7	20964.4	71351.7	255799	1845.63	14805	51646.9	35.1099	13682.7	429.224	16.3103	1552.08	97012.1	37.5157	12.0634	17.5768	145.983	20.7295	2.02541	0.673161	45.8131	343.851	34.5315	187.133	11.7438	271.115	0.604975	0.280052	0.0805807	2.04265	0.183968	1.25909	685.566	25.4408	53.4286	6.71264	28.8678	7.03067	1.99506	6.44494	0.961483	6.3954	1.32065	4.76839	0.503918
	std	3.47654	0.150064	2.18104	91.1544	257.672	266.552	360.342	663.956	60.5135	406.014	0.343772	113.233	1.76317	0.746636	11.018	1279.33	0.223784	0.0776096	0.662721	3.40815	0.770288	0.429262	0.052944	0.840272	4.58708	0.329475	1.75494	0.193229	0.366764	0.0579348	0.076784	0.0250456	0.189517	0.118433	0.0311169	2.38854	0.0614318	0.200618	0.060468	0.257834	0.477799	0.115758	0.287628	0.0355414	0.339443	0.0509462	0.234719	0.0270876
	Ref.	9	2.3	6.2	23963.4	21470.4	70912.8	254320	1614.68	14900	50457.8	33	14100	425	17	1550	96385.2	38	13	21	125	23	1.5	#VALUE!	47	342	35	184	12.5	270	0.5	0.2	0.11	2.6	0.35	1.16	683	24.7	53.3	6.7	28.9	6.59	1.97	6.71	1.02	6.44	1.27	3.7	0.51
	relative deviation from Ref.	-0.0300958	0.385252	0.210949	0.00326701	-0.023566	0.00618958	0.00581682	0.143034	-0.00637782	0.0235666	0.0639373	-0.0295976	0.00993822	-0.040573	0.00134051	0.00650418	-0.0127454	-0.0720472	-0.163012	0.167867	-0.0987193	0.350271	#VALUE!	-0.0252542	0.0054118	-0.013386	0.0170283	-0.0604997	0.00413145	0.20995	0.400259	-0.267449	-0.214366	-0.474376	0.085425	0.00375682	0.0299903	0.00241364	0.00188589	-0.00111541	0.0668694	0.0127207	-0.0395017	-0.0573691	-0.00692589	0.0398849	0.288753	-0.0119252
BIR-1G	RMB-1	n.a.	0.554098	3.49863	13613.8	57756.3	81426	221520	120.865	197.675	95178.9	45.312	5669.05	325.238	402.935	1342.77	81884.3	53.8881	174.284	125.518	86.965	14.5025	1.20166	n.a.	0.648158	109.321	14.5863	14.3939	0.510476	0.000978876	0.164171	0.222176	0.0733956	1.69765	0.770935	0.029981	6.41779	0.567533	1.70748	0.317821	2.6966	1.27451	0.618023	2.0491	0.353401	2.19033	0.542814	1.95032	0.228731
	RMB-2	4.21031	n.a.	n.a.	13649	56769.4	81432.5	222745	224.212	170.698	94983.7	46.5098	5833.25	328.756	389.071	1351.28	80978.5	52.9655	177.321	126.117	76.8412	14.5056	1.7155	0.658605	0.103564	107.779	14.2287	14.1344	0.52158	n.a.	0.148631	0.0948965	0.0604818	0.616594	0.392034	0.0465643	6.1632	0.632316	1.80248	0.359015	2.37058	0.950636	0.544284	1.64267	0.353052	2.26344	0.512731	2.52037	0.272554
	RMB-3	n.a.	0.318423	5.24559	13986.6	56584.6	82268.9	223170	144.764	172.268	94126.9	44.5099	5607.59	329.137	402.469	1340.9	80317.2	53.5034	178.898	128.134	75.0242	14.2744	1.39228	n.a.	0.331464	108.112	14.5256	14.1737	0.528844	0.063023	0.173962	0.0891367	0.0630611	0.633235	0.55903	n.a.	6.24572	0.522561	1.88231	0.364928	2.44424	1.13215	0.540812	1.70167	0.346286	2.60319	0.526523	2.49789	0.256704
	average	4.21031	0.43626	4.37211	13749.8	57036.7	81709.2	222478	163.28	180.214	94763.1	45.4439	5703.3	327.71	398.158	1344.99	81060	53.4523	176.834	126.59	79.6101	14.4275	1.43648	0.658605	0.361062	108.404	14.4469	14.234	0.5203	0.0320009	0.162255	0.135403	0.0656462	0.982492	0.573999	0.0382727	6.27557	0.574137	1.79742	0.347255	2.50381	1.1191	0.567706	1.79782	0.350913	2.35232	0.527356	2.32286	0.252663
	std	0	0.117837	0.87348	168.052	514.35	395.838	699.301	44.1764	12.3638	456.902	0.821786	95.256	1.7553	6.4287	4.51716	642.326	0.378386	1.91483	1.11877	5.2533	0.108225	0.212089	0	0.223312	0.662372	0.156252	0.114199	0.00755304	0.031022	0.01043	0.0614027	0.00557996	0.505737	0.155048	0.00829162	0.106057	0.0450496	0.071465	0.0209522	0.139603	0.132541	0.0356076	0.179311	0.00327476	0.179885	0.0122956	0.263588	0.0181173
	Ref.	3	0.1	n.a.	13725.1	56691.4	82026	222062	117.83	183	95055.1	43	5400	326	392	1471.55	80839.2	52	178	119	78	15	1.2	#VALUE!	0.197	109	14.3	14	0.52	0.075	#VALUE!	0.14	0.086	2.3	0.56	0.007	6.5	0.609	1.89	0.37	2.37	1.09	0.517	1.85	0.35	2.55	0.56	1.7	0.24
	relative deviation from Ref.	0.403438	3.3626	#VALUE!	0.00179567	0.00609162	-0.00386271	0.00187287	0.385728	-0.0152253	-0.00307153	0.0568349	0.0561662	0.00524579	0.0157099	-0.0860077	0.00273138	0.0279289	-0.00655103	0.0637775	0.0206427	-0.0381673	0.197068	#VALUE!	0.832802	-0.00546807	0.0102709	0.016715	0.000576829	-0.573321	#VALUE!	-0.0328357	-0.236672	-0.57283	0.024999	4.46752	-0.0345277	-0.0572467	-0.0489835	-0.0614728	0.0564593	0.0266945	0.0980781	-0.0282072	0.00260874	-0.0775219	-0.0582928	0.366388	0.0527623
BHVO-2G	RMC-1	8.53659	0.813516	5.56744	16920.2	43549.6	71008.5	233650	865.38	4235.67	82745.9	33.9258	16431.4	322.645	291.45	1318.14	87930.9	44.9987	123.801	128.263	115.804	20.2493	1.81619	0.736557	9.30995	400.593	24.7605	171.119	17.3521	3.81055	0.602827	0.0464149	0.0708367	1.67098	0.0785139	0.0503547	130.735	15.3256	37.7814	5.30741	24.7434	6.22499	2.07973	5.92796	0.917136	5.48956	1.01215	2.96023	0.300735
	RMC-2	5.07665	1.08256	n.a.	16981.5	43457.8	71999.3	232260	1662.76	4313.28	82441.8	32.9341	16794.4	326.816	303.524	1353.11	87212.9	44.6079	119.526	130.772	108.288	19.0681	1.53134	0.511758	8.96152	397.891	24.2127	166.719	16.8247	3.97431	0.523911	n.a.	0.0942711	1.37173	0.0238039	0.154386	133.117	15.2082	38.1626	5.19362	24.0537	6.18438	2.16802	5.36052	0.901862	5.08305	0.917417	3.27698	0.339325
	RMC-3	6.18884	0.289794	3.36897	17065.5	42960.5	72923.9	232158	1576.73	4250.94	82304.6	33.0692	16173.4	322.168	290.481	1318.05	87785.5	44.0943	122.375	128.193	107.263	19.3759	1.59621	n.a.	9.00864	389.704	23.4488	166.814	17.5089	4.05812	0.466448	n.a.	0.0813278	1.7297	0.0513833	n.a.	131.219	15.2494	37.5549	5.14903	24.8369	5.83497	2.15764	5.47634	0.886409	4.98428	0.902971	3.52393	0.327563
	average	6.60069	0.728623	4.4682	16989.1	43322.6	71977.3	232690	1368.29	4266.63	82497.4	33.3097	16466.4	323.876	295.152	1329.77	87643.1	44.567	121.901	129.076	110.452	19.5644	1.64791	0.624158	9.09337	396.063	24.1407	168.217	17.2286	3.94766	0.531062	0.0464149	0.0821452	1.59081	0.0512337	0.10237	131.69	15.2611	37.833	5.21669	24.5446	6.08144	2.13513	5.58828	0.901802	5.18563	0.94418	3.25371	0.322541
	std	1.44222	0.329164	1.09924	59.5728	258.776	782.1	680.28	357.342	33.5739	184.41	0.43913	254.715	2.08752	5.93338	16.5045	309.931	0.370343	1.77705	1.19954	3.80755	0.500328	0.121899	0.112399	0.15435	4.6297	0.537891	2.05185	0.292643	0.102809	0.0559058	0	0.00958447	0.156755	0.0223355	0.0520155	1.02784	0.0486367	0.250771	0.0666838	0.349257	0.175072	0.0394022	0.244804	0.0125444	0.218658	0.0484236	0.230719	0.0161494
	Ref.	4.4	1.3	5.51	17805.6	43001	71971.2	230478	1265.56	4270	81475.8	33	16300	308	293	1316.65	87834.9	44	116	127	102	22	1.6	#VALUE!	9.2	396	26	170	18.3	3.8	#VALUE!	0.1	0.1	2.6	0.3	0.1	131	15.2	37.6	5.35	24.5	6.1	2.07	6.16	0.92	5.28	0.98	2.56	0.34
	relative deviation from Ref.	0.500158	-0.439521	-0.189074	-0.0458583	0.00747852	8.40659e-05	0.00959756	0.0811746	-0.000789334	0.0125391	0.00938525	0.0102082	0.0515462	0.00734373	0.00996134	-0.00218368	0.0128858	0.050868	0.016345	0.0828583	-0.110709	0.0299451	#VALUE!	-0.01159	0.000157995	-0.0715129	-0.010486	-0.0585473	0.0388582	#VALUE!	-0.535851	-0.178548	-0.388152	-0.829221	0.0237027	0.00526991	0.00401962	0.00619593	-0.0249183	0.00182175	-0.00304209	0.0314647	-0.0928124	-0.01978	-0.0178731	-0.0365515	0.270981	-0.0513496
[truncated: 9 more columns]

## Sheet: S3-reduction
RSC Advances:
Liu et al: Precise determination of major and trace elements in micrometer-scale ilmenite lamellae in titanomagnetite using LA-ICP-MS technique: Application of regression analysis to time-resolved signals
ESI Table 3: An example of data reduction applied segmented signals and regression analysis
Note: n.a. represents not applicable.
Element	Ti	Mg	Al	Sc	V	Mn	Fe	Co	Ni	Zn	Ga	Ge	Zr	Nb	Sn	Hf	Ta	W
Analyzed Mass	47	25	27	45	51	55	57	59	60	66	71	73	90	93	118	178	181	182
unit	ppm	ppm	ppm	ppm	ppm	ppm	ppm	ppm	ppm	ppm	ppm	ppm	ppm	ppm	ppm	ppm	ppm	ppm
D.L.	1.19508	2.15429	1.73263	0.274279	0.0959389	0.781899	23.4912	0.0901206	0.793208	1.23787	0.20796	0.709817	0.0141908	0.00408731	0.42956	0.0135331	0.00274725	0.017845
Segment
1	105911	33822.6	91.1659	103.311	2570.19	7237.36	551965	84.703	172.107	246.523	6.86236	1.22243	10.9312	98.0442	9.81499	1.68752	6.8505	0.165366
2	84645.3	28635.6	98.1595	81.3163	2722.62	5639.42	586270	85.3933	182.263	219.886	7.37295	1.30099	9.26208	82.4494	9.3989	1.39745	4.82611	0.123596
3	56338	21742.2	105.696	53.8069	2954.5	4075.18	630732	86.6233	194.54	188.482	7.95292	1.41245	5.95373	56.6065	7.2085	0.938906	3.4201	0.0988822
4	29574.7	15571.9	112.626	22.7379	3166.72	2718.6	672081	88.0604	210.102	147.304	8.76441	1.58469	2.93271	27.8657	5.33939	0.321004	1.32137	0.0523727
5	13206.3	10855.3	117.933	12.4701	3234.94	1566.24	698989	88.691	219.63	132.873	9.21551	1.62587	0.977423	11.2296	4.1771	0.139547	0.49509	0.0478029
6	3115.29	9005.79	121.595	3.82078	3303.82	913.989	714347	89.5721	223.387	112.458	9.43149	1.6678	0.23334	2.16683	3.07803	0.029293	0.114583	0.0377004
y=Ax+B
A (Slope)		0.243183	-0.000287633	0.000980603	-0.0072392	0.0596209	-1.57758	-4.67994e-05	-0.000508139	0.00128311	-2.53583e-05	-4.49385e-06	0.000108009	0.00095443	6.72392e-05	1.6942e-05	6.50629e-05	1.22374e-06
B (Intercept)		8071.91	121.899	-1.60813	3345.39	782.387	719381	89.4576	225.135	111.974	9.50406	1.68833	-0.222249	-0.181053	3.22165	-0.0744571	-0.337013	0.0279035
R-squared		0.99937	0.997961	0.996299	0.994763	0.996871	0.999953	0.9902	0.99722	0.996009	0.996376	0.990728	0.997187	0.99704	0.981741	0.991788	0.990219	0.975337
Ilm	355368	94491.5	19.6831	346.867	772.814	21969.8	158760	72.8266	44.558	567.95	0.492513	0.0913576	38.1606	338.993	27.1163	5.94619	22.7843	0.46278
Error (95% conf)		1274.99	2.71411	12.4765	109.65	697.3	2248.04	0.97195	5.6009	16.957	0.319288	0.0907574	1.19762	10.857	1.91435	0.321835	1.34991	0.0406248
Relative error %		0.0134932	0.13789	0.0359691	0.141884	0.0317391	0.01416	0.0133461	0.125699	0.0298565	0.648283	0.993431	0.0313837	0.0320273	0.0705979	0.0541246	0.0592476	0.0877842
direct LA (reference value)	355368	93382.5	11.3047	331.787	773.88	22541.5	172284	72.638	30.4284	539.244	0.253662	n.a.	39.6554	367.129	24.8635	6.35601	25.5085	0.480988
Relative error from reference		0.0118757	0.74114	0.0454504	-0.00137866	-0.0253631	-0.0785003	0.00259661	0.464355	0.0532332	0.941615		-0.0376945	-0.0766379	0.0906059	-0.064478	-0.106796	-0.037855
Mag		8071.91	121.899	-1.60813	3345.39	782.387	719381	89.4576	225.135	111.974	9.50406	1.68833	-0.222249	-0.181053	3.22165	-0.0744571	-0.337013	0.0279035
direct LA (reference value)		8425.26	137.966	6.78726	3401.75	811.323	705622	89.7322	227.977	127.877	9.62001	1.69799	0.0709223	0.0717496	1.06909	n.a.	n.a.	0.0103343
Relative error from reference		0.0437747	0.131804	-5.2206	0.0168476	0.0369844	-0.0191262	0.00306971	0.0126237	0.142023	0.0121999	0.00572341	-1.31911	-1.39629	-0.668155			-0.629642
n		6	6	6	6	6	6	6	6	6	6	6	6	6	6	6	6	6
Mean of Y		19938.9	107.863	46.2438	2992.13	3691.8	642397	87.1738	200.338	174.588	8.26661	1.46904	5.04841	46.3937	6.50282	0.752287	2.83796	0.08762
Sample standard deviation of Y		9927.28	11.7501	40.092	296.203	2436.9	64381.5	1.91928	20.7657	52.4676	1.03674	0.184247	4.41398	39.0074	2.76939	0.694248	2.66825	0.0505673
Mean of X		48798.5	48798.5	48798.5	48798.5	48798.5	48798.5	48798.5	48798.5	48798.5	48798.5	48798.5	48798.5	48798.5	48798.5	48798.5	48798.5	48798.5
Sample standard deviation of X		40809.3	40809.3	40809.3	40809.3	40809.3	40809.3	40809.3	40809.3	40809.3	40809.3	40809.3	40809.3	40809.3	40809.3	40809.3	40809.3	40809.3
Correlation of Y and X		0.999685	-0.99898	0.998148	-0.997378	0.998434	-0.999977	-0.995088	-0.998609	0.998002	-0.998186	-0.995353	0.998592	0.998519	0.990828	0.995886	0.995098	0.987591
R-squared		0.99937	0.997961	0.996299	0.994763	0.996871	0.999953	0.9902	0.99722	0.996009	0.996376	0.990728	0.997187	0.99704	0.981741	0.991788	0.990219	0.975337
Adjusted R-squared		0.999212	0.997451	0.995374	0.993454	0.996089	0.999942	0.98775	0.996525	0.995011	0.99547	0.98841	0.996484	0.9963	0.977176	0.989735	0.987774	0.969171
Standard error of regression		278.655	0.593181	2.72679	23.9645	152.398	491.319	0.212424	1.2241	3.70602	0.0697817	0.0198354	0.261745	2.37285	0.41839	0.0703385	0.295029	0.00887873
SLOPE		0.243183	-0.000287633	0.000980603	-0.0072392	0.0596209	-1.57758	-4.67994e-05	-0.000508139	0.00128311	-2.53583e-05	-4.49385e-06	0.000108009	0.00095443	6.72392e-05	1.6942e-05	6.50629e-05	1.22374e-06
INTERCEPT		8071.91	121.899	-1.60813	3345.39	782.387	719381	89.4576	225.135	111.974	9.50406	1.68833	-0.222249	-0.181053	3.22165	-0.0744571	-0.337013	0.0279035
Confidence level		0.95	0.95	0.95	0.95	0.95	0.95	0.95	0.95	0.95	0.95	0.95	0.95	0.95	0.95	0.95	0.95	0.95
Critical t value		2.77645	2.77645	2.77645	2.77645	2.77645	2.77645	2.77645	2.77645	2.77645	2.77645	2.77645	2.77645	2.77645	2.77645	2.77645	2.77645	2.77645
Standard error of mean at x		459.217	0.977549	4.49369	39.493	251.148	809.683	0.35007	2.01729	6.10744	0.114999	0.0326884	0.43135	3.91041	0.689498	0.115916	0.486202	0.014632

## Sheet: S4-RAC
RSC Advances:
Liu et al: Precise determination of major and trace elements in micrometer-scale ilmenite lamellae in titanomagnetite using LA-ICP-MS technique: Application of regression analysis to time-resolved signals
ESI Table 4: Results of regression analysis on coarse granular ilmenite exsolutions (n=8).
		coarse graunlar Ilm		RAC
Element	d.l.	direct LA		RAC-1				RAC-2				RAC-3				RAC-4				RAC-5				RAC-6				RAC-7				RAC-8
		value	SE	value	SE	RSE	RD	value	SE	RSE	RD	value	SE	RSE	RD	value	SE	RSE	RD	value	SE	RSE	RD	value	SE	RSE	RD	value	SE	RSE	RD	value	SE	RSE	RD
Mg	2.15429	93382.5	684.98	94086.4	1570.68	0.016694	0.00753724	94491.5	1274.99	0.0134932	0.0118757	93892.6	1592.53	0.0169612	0.00546224	94119.4	2149.9	0.0228423	0.00789088	92715	1969.86	0.0212464	-0.00714778	93262.1	1549.05	0.0166096	-0.00128972	92664.5	1510.01	0.0162955	-0.00768865	93875.6	1648.2	0.0175573	0.00528079
Mn	0.781899	22541.5	169.854	22892.7	719.219	0.0314169	0.0155831	21968	697.3	0.0317416	-0.0254417	22783.1	335.729	0.0147359	0.0107172	22773.8	301.785	0.0132514	0.0103076	22714.4	596.835	0.0262756	0.0076709	22663.7	469.957	0.0207362	0.00542029	22428.8	257.858	0.0114968	-0.00499934	22429.5	538.47	0.0240072	-0.00496902
Sc	0.274279	331.787	9.12075	328.98	5.22307	0.0158766	-0.00846186	346.867	12.4765	0.0359691	0.0454513	346.812	12.0424	0.0347231	0.0452855	344.324	12.1174	0.035192	0.0377865	338.05	8.36381	0.0247414	0.0188753	342.588	17.8275	0.0520378	0.0325528	361.031	12.8224	0.0355161	0.0881405	334.822	13.164	0.0393163	0.00914722
Nb	0.00408731	367.129	15.6796	364.082	9.79779	0.0269109	-0.00829909	338.993	10.857	0.0320273	-0.0766372	365.781	4.18754	0.0114482	-0.00367122	356.275	6.6579	0.0186876	-0.0295656	353.819	12.4308	0.0351332	-0.0362555	357.282	13.2689	0.0371384	-0.0268221	365.808	16.4716	0.045028	-0.00359812	363.454	12.6621	0.0348382	-0.0100104
Ta	0.00274725	25.5085	0.735658	25.1531	1.42523	0.0566621	-0.0139319	22.7843	1.34991	0.0592476	-0.106796	23.668	1.16546	0.0492419	-0.0721524	25.2739	0.914206	0.0361719	-0.00919525	25.3491	1.21061	0.0477574	-0.00624768	24.8643	2.02047	0.0812598	-0.0252527	25.6821	1.03495	0.0402984	0.00680433	24.6606	1.33662	0.0542006	-0.0332412
Sn	0.42956	24.8635	1.12458	27.513	2.2566	0.0820195	0.10656	27.1163	1.91435	0.0705979	0.0906059	26.419	3.20872	0.121455	0.0625615	26.9161	2.64127	0.0981298	0.0825542	25.1461	3.14334	0.125003	0.0113647	26.5292	3.12288	0.117715	0.0669944	24.6356	3.20474	0.130085	-0.00916527	25.3334	2.7597	0.108935	0.018897
Zr	0.0141908	39.6554	0.761787	38.2598	0.356674	0.00932244	-0.0351941	38.1606	1.19762	0.0313837	-0.0376945	39.9596	0.204802	0.00512523	0.00767046	39.3555	0.18606	0.00472766	-0.00756189	38.6145	2.05878	0.0533163	-0.0262496	39.3487	1.23613	0.0314148	-0.00773547	39.1703	1.25351	0.0320014	-0.0122322	39.8375	0.78476	0.019699	0.00459251
Hf	0.0135331	6.35601	0.114605	6.15904	0.375061	0.0608959	-0.0309891	5.94619	0.321835	0.0541246	-0.064478	6.37264	0.271725	0.0426393	0.00261676	6.43739	0.314206	0.0488095	0.0128041	6.19506	0.454102	0.0733006	-0.0253229	6.29886	0.36438	0.0578485	-0.00899175	6.24826	0.409188	0.0654884	-0.0169527	6.31841	0.41672	0.0659532	-0.00591516
d.l. = detection limits (analytical)
value = calculation of element contents from regression analysis
SE = statistical uncertainties at 95% confidence level
RSE = relative standard error= 'SE'/'value'
RD = relative deviation from preffered value (direct LA results) = 'value'/'preferred value'-1

## Sheet: S5-RAF
RSC Advances:
Liu et al: Precise determination of major and trace elements in micrometer-scale ilmenite lamellae in titanomagnetite using LA-ICP-MS technique: Application of regression analysis to time-resolved signals
ESI Table 5: Results of regression analysis on fine ilmenite exsolutions (n=12)
		ilmenite lamellae		RAF
Element	d.l.	EPMA		RAF-1				RAF-2				RAF-3				RAF-4				RAF-5				RAF-6				RAF-7				RAF-8				RAF-9				RAF-10				RAF-11				RAF-12
		value	SE	value	SE	RSE	RD	value	SE	RSE	RD	value	SE	RSE	RD	value	SE	RSE	RD	value	SE	RSE	RD	value	SE	RSE	RD	value	SE	RSE	RD	value	SE	RSE	RD	value	SE	RSE	RD	value	SE	RSE	RD	value	SE	RSE	RD	value	SE
Mg	2.15429	99953.2	2149.52	92406.8	2776.13	0.0300424	-0.0754992	94568.9	2020.93	0.0213699	-0.0538681	92805.7	2174.57	0.0234315	-0.0715086	94356.2	1966.99	0.0208464	-0.0559957	96419.9	3073.7	0.0318783	-0.0353495	93883	2630.05	0.0280141	-0.0607303	94474.5	2528.5	0.0267639	-0.0548129	93940.5	1523.38	0.0162164	-0.060155	94686	2621.69	0.0276882	-0.0526963	93639	2983.94	0.0318665	-0.0631715	93324.6	2247.93	0.0240872	-0.0663166	93259	2386.19
Mn	0.781899	23955.4	319.332	23182.9	627.203	0.0270546	-0.0322489	22856.4	423.542	0.0185306	-0.0458764	22647	288.411	0.0127351	-0.0546169	22719.4	401.652	0.0176788	-0.0515961	23335.8	501.482	0.0214898	-0.0258648	22659.9	406.948	0.017959	-0.0540802	23053.4	353.518	0.0153347	-0.0376526	22837.1	277.824	0.0121655	-0.0466828	22348.3	525.846	0.0235296	-0.0670888	22420.1	325.388	0.0145133	-0.0640911	22331	270.483	0.0121124	-0.0678079	23026.3	351.686
Sc	0.274279			159.828	14.9607	0.0936052		156.106	8.10627	0.0519279		162.015	4.37609	0.0270103		163.593	3.65158	0.0223212		165.263	10.5913	0.0640873		158.618	7.86863	0.0496074		163.09	12.1841	0.0747077		161.11	1.95331	0.0121241		162.213	3.28715	0.0202644		154.235	4.49969	0.0291743		163.027	4.32416	0.0265242		161.935	2.57385
Nb	0.00408731			247.549	17.753	0.0717152		252.929	13.2244	0.0522851		243.775	3.5791	0.014682		245.955	6.03286	0.0245283		242.994	9.6262	0.039615		260.194	6.47102	0.02487		259.186	5.47887	0.0211388		247.609	1.51433	0.0061158		243.282	4.59688	0.0188953		244.431	5.3726	0.02198		251.209	6.65835	0.0265052		263.318	4.56194
Ta	0.00274725			17.8946	0.641022	0.0358221		17.8677	0.523503	0.0292988		17.8946	0.641022	0.0358221		18.1532	0.536654	0.0295625		17.6527	0.475838	0.0269556		18.2563	1.28441	0.0703546		17.2947	0.823545	0.0476183		18.2389	0.980832	0.0537769		16.8072	0.819161	0.0487388		17.6018	0.762298	0.043308		16.4705	0.852557	0.0517628		17.359	0.962928
Sn	0.42956			19.2905	0.996872	0.051677		18.5937	1.22121	0.0656785		18.4777	2.29924	0.124433		18.8592	2.60502	0.13813		18.4121	2.8838	0.156626		16.9939	3.21733	0.189323		17.6631	3.04397	0.172335		17.9613	1.27717	0.0711068		18.5234	1.58473	0.0855531		19.296	2.64716	0.137187		18.232	3.20098	0.17557		18.8861	2.9723
Zr	0.0141908			20.9293	3.22443	0.154063		21.5873	2.04239	0.0946106		22.5063	1.94347	0.0863521		21.7774	1.18961	0.0546259		21.7226	2.54602	0.117206		19.1386	1.43865	0.0751699		22.5513	0.771027	0.03419		21.7226	0.506136	0.0233		20.3603	2.23354	0.109701		19.6104	1.58703	0.0809279		21.1911	2.42807	0.11458		19.8712	0.490672
Hf	0.0135331			2.34493	0.526127	0.224368		2.2148	0.434963	0.196389		2.58424	0.163065	0.0630996		2.45769	0.219256	0.0892121		2.57735	0.437803	0.169866		2.33426	0.368929	0.15805		2.78438	0.543719	0.195275		2.51905	0.22404	0.0889383		2.2543	0.237264	0.10525		2.75193	0.325517	0.118287		2.38116	0.464459	0.195056		2.50366	0.388531
d.l. = detection limits (analytical)
value = calculation of element contents from regression analysis
SE = statistical uncertainties at 95% confidence level
RSE = relative standard error= 'SE'/'value'
RD = relative deviation from preffered value (EPMA results) = 'value'/'preferred value'-1
[truncated: 2 more columns]
